# Supplementary material for: Patterns of Gene Expression in Western Corn Rootworm (Diabrotica virgifera virgifera) Neonates, Challenged with Cry34Ab1, Cry35Ab1 and Cry34/35Ab1, Based on Next-Generation Sequencing
Source: MDPI journal article supplement (doi:10.3390/toxins9040124), 2017-03-30
Supplement: s1 [file s1]

# Supplementary Materials: Patterns of Gene Expression in Western Corn Rootworm (*Diabrotica virgifera virgifera*) Neonates, Challenged with Cry34Ab1, Cry35Ab1 and Cry34/35Ab1, Based on Next-Generation Sequencing

Haichuan Wang, Seong-il Eyun, Kanika Arora, Sek Yee Tan, Premchand Gandra, Etsuko Moriyama, Chitvan Khajuria, Jessica Jurzenski, Huarong Li, Maia Donahue, Ken Narva and Blair Siegfried

**Table S1.** Reads generated on RNAseq for each treatment and control.

| Treatment       | Replicates | Raw reads  | Reads after filtering | Treatment      | Replicates | Raw reads  | Reads after filtering |
|-----------------|------------|------------|-----------------------|----------------|------------|------------|-----------------------|
| <b>34Ab1</b>    | 1          | 43,878,467 | 43,000,697            | <b>35Ab1</b>   | 1          | 52,627,083 | 51,337,801            |
|                 | 2          | 67,453,316 | 66,138,309            |                | 2          | 72,377,483 | 71,022,040            |
|                 | 3          | 54,090,779 | 52,645,383            |                | 3          | 60,588,973 | 59,204,754            |
|                 | 4          | 46,499,131 | 45,536,519            |                | 4          | 95,534,011 | 93,551,718            |
|                 | 5          | 58,632,657 | 57,607,911            |                | 5          | 55,244,454 | 54,360,811            |
|                 | 6          | 60,566,736 | 59,306,183            |                | 6          | 54,383,911 | 53,574,954            |
| <b>34/35Ab1</b> | 1          | 49,958,689 | 48,322,143            | <b>Control</b> | 1          | 43,886,263 | 42,965,828            |
|                 | 2          | 73,623,445 | 72,094,127            |                | 2          | 52,412,797 | 51,105,386            |
|                 | 3          | 68,986,765 | 67,703,519            |                | 3          | 55,045,308 | 53,941,838            |
|                 | 4          | 39,331,805 | 38,387,901            |                | 4          | 42,630,516 | 41,576,918            |
|                 | 5          | 34,628,586 | 33,655,979            |                | 5          | 54,292,321 | 53,020,759            |
|                 | 6          | 64,366,787 | 63,342,959            |                | 6          | 46,251,448 | 45,015,806            |

**Table S2.** Summary of Illumina generated read production and read for mapping after filtering.

|                              | <b>34</b>   | <b>35</b>   | <b>34/35 Control</b> | <b>34</b>   |
|------------------------------|-------------|-------------|----------------------|-------------|
| No. of reads                 | 331 million | 390 million | 330 million          | 294 million |
| read length (bp)             | 101         | 101         | 101                  | 101         |
| No. of reads after filtering | 324 million | 383 million | 323 million          | 287 million |
| percentage retained          | 97.9        | 98          | 97.7                 | 97.6        |

**Table S3.** 18 unique functional activities associated with 34/35Ab1 treatment as compared to 34Ab1 treatment.

| <b>antioxidant activity</b>                        |
|----------------------------------------------------|
| biological adhesion                                |
| cell junction                                      |
| cellular component organization or biogenesis      |
| developmental process                              |
| enzyme regulator activity growth                   |
| localization                                       |
| membrane                                           |
| membrane-enclosed lumen                            |
| molecular transducer activity                      |
| multicellular organismal process                   |
| multi-organism process                             |
| nucleic acid binding transcription factor activity |
| receptor activity                                  |
| reproduction                                       |
| synapse                                            |
| transporter activity                               |

**Table S4.** Summary of GO term enrichment results of significantly regulated genes in treatment with Cry34Ab1 at FDR < 0.05.

| <b>In Up-regulated Category</b>   |                                |          |          |                         |
|-----------------------------------|--------------------------------|----------|----------|-------------------------|
| GO-ID                             | Term                           | Category | FDR      | Over/Under <sup>a</sup> |
| GO:0008270                        | zinc ion binding               | F        | 2.19E-02 | over                    |
| GO:0046914                        | transition metal ion binding   | F        | 2.33E-02 | over                    |
| <b>In Down-regulated Category</b> |                                |          |          |                         |
| GO-ID                             | Term                           | Category | FDR      | Over/Under <sup>a</sup> |
| GO:0004553                        | hydrolase activity             | F        | 1.43E-02 | over                    |
| GO:0016798                        | hydrolase activity             | F        | 2.00E-02 | over                    |
| GO:0005975                        | carbohydrate metabolic process | P        | 0.00245  | over                    |

<sup>a</sup> over/under indicates if this GO term is enriched or not as compared to WCR transcriptome reference.

**Table S5.** Summary of GO term enrichment results of significantly up-regulated DEGs in treatment with Cry34/35Ab1 at FDR < 0.05.

| GO-ID      | Term                                         | Category | FDR      | Over/Under <sup>a</sup> |
|------------|----------------------------------------------|----------|----------|-------------------------|
| GO:0003878 | ATP citrate synthase activity                | F        | 2.33E-06 | OVER                    |
| GO:0004775 | succinate-CoA ligase (ADP-forming) activity  | F        | 2.33E-06 | OVER                    |
| GO:0004774 | succinate-CoA ligase activity                | F        | 2.33E-06 | OVER                    |
| GO:0016405 | CoA-ligase activity                          | F        | 3.26E-06 | OVER                    |
| GO:0016878 | acid-thiol ligase activity                   | F        | 3.26E-06 | OVER                    |
| GO:0046912 | transferase activity                         | F        | 9.73E-06 | OVER                    |
| GO:0016877 | ligase activity, forming carbon-sulfur bonds | F        | 1.9E-05  | OVER                    |
| GO:0043167 | ion binding                                  | F        | 4.29E-05 | OVER                    |
| GO:0005524 | ATP binding                                  | F        | 0.000167 | OVER                    |
| GO:0032559 | adenyl ribonucleotide binding                | F        | 0.000167 | OVER                    |
| GO:0030554 | adenyl nucleotide binding                    | F        | 0.000207 | OVER                    |
| GO:0035639 | purine ribonucleoside triphosphate binding   | F        | 0.000342 | OVER                    |
| GO:0032550 | purine ribonucleoside binding                | F        | 0.000342 | OVER                    |

|            |                                                         |   |          |      |
|------------|---------------------------------------------------------|---|----------|------|
| GO:0032555 | purine ribonucleotide binding                           | F | 0.000342 | OVER |
| GO:0001883 | purine nucleoside binding                               | F | 0.000342 | OVER |
| GO:0032549 | ribonucleoside binding                                  | F | 0.000342 | OVER |
| GO:0001882 | nucleoside binding                                      | F | 0.000342 | OVER |
| GO:0032553 | ribonucleotide binding                                  | F | 0.000351 | OVER |
| GO:0017076 | purine nucleotide binding                               | F | 0.000374 | OVER |
| GO:0097367 | carbohydrate derivative binding                         | F | 0.000443 | OVER |
| GO:0043168 | anion binding                                           | F | 0.001521 | OVER |
| GO:0004767 | sphingomyelin phosphodiesterase activity                | F | 0.001927 | OVER |
| GO:0004672 | protein kinase activity                                 | F | 0.002168 | OVER |
| GO:0005388 | calcium-transporting ATPase activity                    | F | 0.00369  | OVER |
| GO:0016874 | ligase activity                                         | F | 0.006764 | OVER |
| GO:0016740 | transferase activity                                    | F | 0.008216 | OVER |
| GO:0004620 | phospholipase activity                                  | F | 0.008521 | OVER |
| GO:0016773 | phosphotransferase activity                             | F | 0.009478 | OVER |
| GO:0016298 | lipase activity                                         | F | 0.013152 | OVER |
| GO:0015662 | ATPase activity                                         | F | 0.02097  | OVER |
| GO:1901265 | nucleoside phosphate binding                            | F | 0.022184 | OVER |
| GO:0000166 | nucleotide binding                                      | F | 0.022184 | OVER |
| GO:0036094 | small molecule binding                                  | F | 0.024149 | OVER |
| GO:0016301 | kinase activity                                         | F | 0.027656 | OVER |
| GO:0043169 | cation binding                                          | F | 0.03705  | OVER |
| GO:0016477 | cell migration                                          | P | 1.23E-05 | OVER |
| GO:0009395 | phospholipid catabolic process                          | P | 4.29E-05 | OVER |
| GO:0006685 | sphingomyelin catabolic process                         | P | 4.29E-05 | OVER |
| GO:0006684 | sphingomyelin metabolic process                         | P | 4.29E-05 | OVER |
| GO:0006665 | sphingolipid metabolic process                          | P | 4.29E-05 | OVER |
| GO:0030149 | sphingolipid catabolic process                          | P | 4.29E-05 | OVER |
| GO:0046466 | membrane lipid catabolic process                        | P | 4.29E-05 | OVER |
| GO:0007015 | actin filament organization                             | P | 4.67E-05 | OVER |
| GO:0046578 | regulation of Ras protein signal transduction           | P | 5.82E-05 | OVER |
| GO:0007265 | Ras protein signal transduction                         | P | 7.15E-05 | OVER |
| GO:0051674 | localization of cell                                    | P | 7.77E-05 | OVER |
| GO:0048870 | cell motility                                           | P | 7.77E-05 | OVER |
| GO:0040011 | locomotion                                              | P | 0.000117 | OVER |
| GO:0030036 | actin cytoskeleton organization                         | P | 0.00025  | OVER |
| GO:0030029 | actin filament-based process                            | P | 0.000281 | OVER |
| GO:0051056 | regulation of small GTPase mediated signal transduction | P | 0.00029  | OVER |
| GO:0046434 | organophosphate catabolic process                       | P | 0.000332 | OVER |
| GO:0045454 | cell redox homeostasis                                  | P | 0.000343 | OVER |
| GO:1901565 | organonitrogen compound catabolic process               | P | 0.000381 | OVER |
| GO:1902531 | regulation of intracellular signal transduction         | P | 0.000443 | OVER |
| GO:0042439 | ethanolamine-containing compound metabolic process      | P | 0.000443 | OVER |
| GO:1901616 | organic hydroxy compound catabolic process              | P | 0.000443 | OVER |

|            |                                                   |   |          |      |
|------------|---------------------------------------------------|---|----------|------|
| GO:0046164 | alcohol catabolic process                         | P | 0.000443 | OVER |
| GO:0007155 | cell adhesion                                     | P | 0.000459 | OVER |
| GO:0022610 | biological adhesion                               | P | 0.000459 | OVER |
| GO:0044712 | single-organism catabolic process                 | P | 0.001019 | OVER |
| GO:0043087 | regulation of GTPase activity                     | P | 0.001019 | OVER |
| GO:0033124 | regulation of GTP catabolic process               | P | 0.001019 | OVER |
| GO:0030811 | regulation of nucleotide catabolic process        | P | 0.001019 | OVER |
| GO:0009118 | regulation of nucleoside metabolic process        | P | 0.001019 | OVER |
| GO:0033121 | regulation of purine nucleotide catabolic process | P | 0.001019 | OVER |
| GO:1900542 | regulation of purine nucleotide metabolic process | P | 0.001043 | OVER |
| GO:0006140 | regulation of nucleotide metabolic process        | P | 0.001045 | OVER |
| GO:0031329 | regulation of cellular catabolic process          | P | 0.001163 | OVER |
| GO:0009894 | regulation of catabolic process                   | P | 0.00124  | OVER |
| GO:0009966 | regulation of signal transduction                 | P | 0.00152  | OVER |
| GO:0044242 | cellular lipid catabolic process                  | P | 0.00152  | OVER |
| GO:0044248 | cellular catabolic process                        | P | 0.00152  | OVER |
| GO:0010646 | regulation of cell communication                  | P | 0.001521 | OVER |
| GO:0023051 | regulation of signaling                           | P | 0.001521 | OVER |
| GO:0006643 | membrane lipid metabolic process                  | P | 0.001713 | OVER |
| GO:0048583 | regulation of response to stimulus                | P | 0.001927 | OVER |
| GO:0006468 | protein phosphorylation                           | P | 0.001927 | OVER |
| GO:0007010 | cytoskeleton organization                         | P | 0.001927 | OVER |
| GO:0043603 | cellular amide metabolic process                  | P | 0.002602 | OVER |
| GO:0006576 | cellular biogenic amine metabolic process         | P | 0.00296  | OVER |
| GO:0019637 | organophosphate metabolic process                 | P | 0.00296  | OVER |
| GO:0019220 | regulation of phosphate metabolic process         | P | 0.003017 | OVER |
| GO:0051174 | regulation of phosphorus metabolic process        | P | 0.003017 | OVER |
| GO:1901575 | organic substance catabolic process               | P | 0.003058 | OVER |
| GO:0009056 | catabolic process                                 | P | 0.003708 | OVER |
| GO:0019725 | cellular homeostasis                              | P | 0.004193 | OVER |
| GO:0051336 | regulation of hydrolase activity                  | P | 0.004193 | OVER |
| GO:0009308 | amine metabolic process                           | P | 0.004469 | OVER |
| GO:0044106 | cellular amine metabolic process                  | P | 0.004469 | OVER |
| GO:0016042 | lipid catabolic process                           | P | 0.004978 | OVER |
| GO:0071822 | protein complex subunit organization              | P | 0.00499  | OVER |
| GO:0007264 | small GTPase mediated signal transduction         | P | 0.005543 | OVER |
| GO:0006928 | cellular component movement                       | P | 0.006837 | OVER |
| GO:0042592 | homeostatic process                               | P | 0.007285 | OVER |
| GO:0044262 | cellular carbohydrate metabolic process           | P | 0.00827  | OVER |
| GO:1901564 | organonitrogen compound metabolic process         | P | 0.009478 | OVER |
| GO:1901069 | guanosine-containing compound catabolic process   | P | 0.010194 | OVER |
| GO:0006184 | GTP catabolic process                             | P | 0.010194 | OVER |
| GO:0009261 | ribonucleotide catabolic process                  | P | 0.01085  | OVER |

|            |                                                      |   |          |      |
|------------|------------------------------------------------------|---|----------|------|
| GO:0009207 | purine ribonucleoside triphosphate catabolic process | P | 0.01085  | OVER |
| GO:0009203 | ribonucleoside triphosphate catabolic process        | P | 0.01085  | OVER |
| GO:0009154 | purine ribonucleotide catabolic process              | P | 0.01085  | OVER |
| GO:0009146 | purine nucleoside triphosphate catabolic process     | P | 0.01085  | OVER |
| GO:0006195 | purine nucleotide catabolic process                  | P | 0.01085  | OVER |
| GO:0006152 | purine nucleoside catabolic process                  | P | 0.01085  | OVER |
| GO:0046130 | purine ribonucleoside catabolic process              | P | 0.01085  | OVER |
| GO:0009143 | nucleoside triphosphate catabolic process            | P | 0.01085  | OVER |
| GO:0042454 | ribonucleoside catabolic process                     | P | 0.01085  | OVER |
| GO:0009164 | nucleoside catabolic process                         | P | 0.01085  | OVER |
| GO:1901658 | glycosyl compound catabolic process                  | P | 0.01085  | OVER |
| GO:0072523 | purine-containing compound catabolic process         | P | 0.01085  | OVER |
| GO:0005975 | carbohydrate metabolic process                       | P | 0.010887 | OVER |
| GO:0046039 | GTP metabolic process                                | P | 0.010952 | OVER |
| GO:0009166 | nucleotide catabolic process                         | P | 0.011213 | OVER |
| GO:1901292 | nucleoside phosphate catabolic process               | P | 0.011213 | OVER |
| GO:1901068 | guanosine-containing compound metabolic process      | P | 0.011213 | OVER |
| GO:1901136 | carbohydrate derivative catabolic process            | P | 0.013152 | OVER |
| GO:0009205 | purine ribonucleoside triphosphate metabolic process | P | 0.014041 | OVER |
| GO:0009144 | purine nucleoside triphosphate metabolic process     | P | 0.014041 | OVER |
| GO:0034655 | nucleobase-containing compound catabolic process     | P | 0.014041 | OVER |
| GO:0009199 | ribonucleoside triphosphate metabolic process        | P | 0.014383 | OVER |
| GO:0044270 | cellular nitrogen compound catabolic process         | P | 0.014383 | OVER |
| GO:0046700 | heterocycle catabolic process                        | P | 0.014495 | OVER |
| GO:0019439 | aromatic compound catabolic process                  | P | 0.014495 | OVER |
| GO:1901361 | organic cyclic compound catabolic process            | P | 0.014732 | OVER |
| GO:0009141 | nucleoside triphosphate metabolic process            | P | 0.014972 | OVER |
| GO:1902589 | single-organism organelle organization               | P | 0.015844 | OVER |
| GO:0046128 | purine ribonucleoside metabolic process              | P | 0.015971 | OVER |
| GO:0042278 | purine nucleoside metabolic process                  | P | 0.016099 | OVER |
| GO:0009119 | ribonucleoside metabolic process                     | P | 0.017853 | OVER |
| GO:0044281 | small molecule metabolic process                     | P | 0.019454 | OVER |
| GO:0050790 | regulation of catalytic activity                     | P | 0.020791 | OVER |
| GO:0009150 | purine ribonucleotide metabolic process              | P | 0.021374 | OVER |
| GO:0009116 | nucleoside metabolic process                         | P | 0.021374 | OVER |
| GO:1901657 | glycosyl compound metabolic process                  | P | 0.021374 | OVER |
| GO:0065009 | regulation of molecular function                     | P | 0.021374 | OVER |
| GO:0006066 | alcohol metabolic process                            | P | 0.021423 | OVER |

|            |                                                        |   |          |      |
|------------|--------------------------------------------------------|---|----------|------|
| GO:0006163 | purine nucleotide metabolic process                    | P | 0.021501 | OVER |
| GO:0044763 | single-organism cellular process                       | P | 0.021598 | OVER |
| GO:0009259 | ribonucleotide metabolic process                       | P | 0.022184 | OVER |
| GO:0019693 | ribose phosphate metabolic process                     | P | 0.022184 | OVER |
| GO:0035556 | intracellular signal transduction                      | P | 0.022596 | OVER |
| GO:0072521 | purine-containing compound metabolic process           | P | 0.023217 | OVER |
| GO:1901615 | organic hydroxy compound metabolic process             | P | 0.027656 | OVER |
| GO:0044282 | small molecule catabolic process                       | P | 0.028892 | OVER |
| GO:0043933 | macromolecular complex subunit organization            | P | 0.029575 | OVER |
| GO:0009117 | nucleotide metabolic process                           | P | 0.040393 | OVER |
| GO:0006753 | nucleoside phosphate metabolic process                 | P | 0.040666 | OVER |
| GO:0016310 | phosphorylation                                        | P | 0.042679 | OVER |
| GO:0050794 | regulation of cellular process                         | P | 0.047028 | OVER |
| GO:0055086 | nucleobase-containing small molecule metabolic process | P | 0.049905 | OVER |

<sup>a</sup> over/under indicates if this GO term is enriched or not as compared to WCR transcriptome reference.

**Table S6.** Summary of GO term enrichment results of significantly down-regulated DEGs in treatment with Cry34/35Ab1 respectively at FDR < 0.05.

| GO-ID       | Term                                                 | Category | FDR      | Over/Under <sup>a</sup> |
|-------------|------------------------------------------------------|----------|----------|-------------------------|
| GO:0016798* | hydrolase activity, acting on glycosyl bonds         | F        | 1.24E-07 | OVER                    |
| GO:0004563  | beta-N-acetylhexosaminidase activity                 | F        | 7.48E-06 | OVER                    |
| GO:0004553* | hydrolase activity, hydrolyzing O-glycosyl compounds | F        | 7.48E-06 | OVER                    |
| GO:0015929  | hexosaminidase activity                              | F        | 8.48E-06 | OVER                    |
| GO:0016787  | hydrolase activity                                   | F        | 0.017657 | OVER                    |
| GO:0004523  | RNA-DNA hybrid ribonuclease activity                 | F        | 0.017745 | OVER                    |
| GO:0006032  | chitin catabolic process                             | P        | 7.48E-06 | OVER                    |
| GO:0006026  | aminoglycan catabolic process                        | P        | 8.48E-06 | OVER                    |
| GO:1901072  | glucosamine-containing compound catabolic process    | P        | 1.04E-05 | OVER                    |
| GO:0046348  | amino sugar catabolic process                        | P        | 1.04E-05 | OVER                    |
| GO:0005975* | carbohydrate metabolic process                       | P        | 0.00245  | OVER                    |
| GO:0006030  | chitin metabolic process                             | P        | 0.004376 | OVER                    |
| GO:0006022  | aminoglycan metabolic process                        | P        | 0.005214 | OVER                    |
| GO:1901071  | glucosamine-containing compound metabolic process    | P        | 0.005214 | OVER                    |
| GO:0006040  | amino sugar metabolic process                        | P        | 0.005214 | OVER                    |
| GO:0009057  | macromolecule catabolic process                      | P        | 0.03855  | OVER                    |
| GO:0009987  | cellular process                                     | P        | 0.000419 | UNDER                   |
| GO:0044237  | cellular metabolic process                           | P        | 0.020641 | UNDER                   |

<sup>a</sup> over/under indicates if this GO term is enriched or not as compared to WCR transcriptome reference.

\* the GO terms highlighted in light brown were shared between Cry34Ab1 and Cry34/35Ab1 treatment.

**Table S7.** KEGG pathways involving 323 DEGs in Cry34/35Ab1 treatment as compared to control.

| Pathways                                    | #Seqs | Category       |
|---------------------------------------------|-------|----------------|
| Carbon fixation pathways in prokaryotes     | 5     | up-regulated   |
| Pyrimidine metabolism                       | 5     |                |
| Citrate cycle (TCA cycle)                   | 5     |                |
| Propanoate metabolism                       | 4     |                |
| Purine metabolism                           | 4     |                |
| Nicotinate and nicotinamide metabolism      | 4     |                |
| C5-Branched dibasic acid metabolism         | 4     |                |
| Sphingolipid metabolism                     | 3     |                |
| Tyrosine metabolism                         | 2     |                |
| Isoquinoline alkaloid biosynthesis          | 2     |                |
| Oxidative phosphorylation                   | 1     |                |
| Glyoxylate and dicarboxylate metabolism     | 1     |                |
| Clycine, serine and threonine metabolism    | 1     |                |
| T cell receptor signaling pathway           | 1     |                |
| Porphyrin and chlorophyll pathway           | 1     |                |
| Glutathione metabolism                      | 1     |                |
| Tryptophan metabolism                       | 1     |                |
| Pyrimidine metabolism                       | 7     | down-regulated |
| Other glycan degradation                    | 6     |                |
| Starch and sucrose metabolism               | 5     |                |
| One carbon pool by folate                   | 5     |                |
| Amino sugar and nucleotide sugar metabolism | 5     |                |
| Various types of N-glycan biosynthesis      | 4     |                |
| Glycosphingolipid biosynthesis-ganglio      | 4     |                |
| Glycosphingolipid biosynthesis-globo serine | 4     |                |
| Glycosaminoglycan degradation               | 4     |                |
| Purine metabolism                           | 4     |                |
| Glutathione metabolism                      | 3     |                |
| Clycine, serine and threonine metabolism    | 3     |                |
| Phenylalanine metabolism                    | 3     |                |
| Glycolysis/Gluconeogenesis                  | 2     |                |
| Phenylpropanoid biosynthesis                | 2     |                |
| Histidine metabolism                        | 2     |                |
| Thiamine metabolism                         | 2     |                |
| Fatty acid degradation                      | 2     |                |
| Tryptophan metabolism                       | 2     |                |
| Lysine degradation                          | 2     | down-regulated |
| Carbon fixation in photosynthetic organisms | 1     |                |
| Inositol phosphate metabolism               | 1     |                |
| Glycerolipid metabolism                     | 1     |                |
| Arginine metabolism                         | 1     |                |
| Propanoate metabolism                       | 1     |                |

|                                              |   |
|----------------------------------------------|---|
| Isoquinoline alkaloid biosynthesis           | 1 |
| Betalain biosynthesis                        | 1 |
| Pentose and glucuronate interconversions     | 1 |
| Cysteine and methionine metabolism           | 1 |
| Ascorbate and aldarate metabolism            | 1 |
| Tyrosine metabolism                          | 1 |
| Fructose and mannose metabolism              | 1 |
| Limonene and pinene degradation              | 1 |
| Valine, leucine and isoleucine degradation   | 1 |
| Indole alkaloid biosynthesis                 | 1 |
| Terpenoid backbone biosynthesis              | 1 |
| Arachidonic acid metabolism                  | 1 |
| Drug metabolism-cytochrome P450              | 1 |
| Metabolism of xenobiotics by cytochrome P450 | 1 |
| Chloroalkane and chloroalkene degradation    | 1 |
| Pyruvate metabolism                          | 1 |

**Table S8.** Primers used in validation of gene expression via qPCR.

| Primer                  | oligoes (5'-3')      | Primer efficiency |
|-------------------------|----------------------|-------------------|
| Dv_GH45_qPCR_F          | GGGTATGTTGCTGCTCGTTT | 96%               |
| Dv_GH45_qPCR_R          | TTGTTTCAGGTGCATTTCCA |                   |
| Dv_ALP_qPCR_F           | ACGAAATCGCTGCAGAAAAG | 104.3%            |
| Dv_ALP_qPCR_R           | TGGACATTCCATCTCCAAGA |                   |
| Dv_AAtransporter_qPCR_F | CTACGCAGGTGGACTCACAA | 92.1%             |
| Dv_AAtransporter_qPCR_R | GGTCGGTGTATTCGTCACCT |                   |
| Dv_gutChitinase_qPCR_F  | AGCTGCAAATGCAATGTTGA | 102%              |
| Dv_gutChitinase_qPCR_R  | AAAATCGTCCTTGTCGATGG |                   |
